# Supplementary material
Source: publisher figshare collection journal article supplement (https://gsajournals.figshare.com/ndownloader/files/25453568)
Supplement: Supplementary file 1 [file 25453568]

## Sheet: Table S1
Table S1. P values associated with all statistical comparisons made in main and extended data hatch rate and cytology figures. M=male, F=female,+=Wolbachiainfected,−=Wolbachiauninfected
Figure	Comparison	Summary	P value	Test
Fig 2B	[M;-]nos-GAL4:VP16;cifAwMel;cifB x [F;-]nos-GAL4:VP16;wt vs [M;-]nos-GAL4:VP16;wMel cifA;cifB x [F;-] nos-GAL4:VP16;wMel cifA	****	<0.0001	Kruskal-Wallis with Dunn's multiple correction test
	[M;-]nos-GAL4:VP16;wRec cifA x [F;-]nos-GAL4:VP16;wt vs [M;-]nos-GAL4:VP16;wMel cifA;cifB x [F;-] nos-GAL4:VP16	ns	>0.9999	Kruskal-Wallis with Dunn's multiple correction test
	[M;-]nos-GAL4:VP16;wRec cifBx [F;-]nos-GAL4:VP16;wt vs [M;-]nos-GAL4:VP16;wMel cifA;cifB x [F;-] nos-GAL4:VP16	****	<0.0001	Kruskal-Wallis with Dunn's multiple correction test
	[M;-]nos-GAL4:VP16;wRec cifA;cifB x [F;-]nos-GAL4:VP16;wt vs [M;-]nos-GAL4:VP16;wMel cifA;cifB x [F;-] nos-GAL4:VP16	****	<0.0001	Kruskal-Wallis with Dunn's multiple correction test
	[M;-]nos-GAL4:VP16;wMel cifA;cifB x [F;-]nos-GAL4:VP16;wRec cifA vs [M;-]nos-GAL4:VP16;wMel cifA;cifB x [F;-] nos-GAL4:VP16	ns	>0.9999	Kruskal-Wallis with Dunn's multiple correction test
	[M;-]nos-GAL4:VP16;wRec cifB x [F;-]nos-GAL4:VP16;wRec cifA vs [M;-]nos-GAL4:VP16;wMel cifA;cifB x [F;-] nos-GAL4:VP16	****	<0.0001	Kruskal-Wallis with Dunn's multiple correction test
	[M;-]nos-GAL4:VP16;wRec cifA;cifB x [F;-]nos-GAL4:VP16;wRec cifA vs [M;-]nos-GAL4:VP16;wMel cifA;cifB x [F;-] nos-GAL4:VP16	ns	>0.9999	Kruskal-Wallis with Dunn's multiple correction test
	[M;-]nos-GAL4:VP16;wMel cifA;cifB x [F;-]nos-GAL4:VP16;wRec cifA; cifB vs [M;-]nos-GAL4:VP16;wMel cifA;cifB x [F;-] nos-GAL4:VP16	ns	0.1013	Kruskal-Wallis with Dunn's multiple correction test
	[M;-]nos-GAL4:VP16;wRec cifB x [F;-]nos-GAL4:VP16;wRec cifA; cifB vs [M;-]nos-GAL4:VP16;wMel cifA;cifB x [F;-] nos-GAL4:VP16	****	<0.0001	Kruskal-Wallis with Dunn's multiple correction test
	[M;-]nos-GAL4:VP16;wRec cifA;cifB x [F;-]nos-GAL4:VP16;wRec cifA; cifB vs [M;-]nos-GAL4:VP16;wMel cifA;cifB x [F;-] nos-GAL4:VP16	**	0.0054	Kruskal-Wallis with Dunn's multiple correction test
	[M;-]nos-GAL4:VP16;wRec cifB x [F;-]nos-GAL4:VP16;wMel cifA vs [M;-]nos-GAL4:VP16;wMel cifA;cifB x [F;-] nos-GAL4:VP16	****	<0.0001	Kruskal-Wallis with Dunn's multiple correction test
	[M;-]nos-GAL4:VP16;wRec cifA;cifB x [F;-]nos-GAL4:VP16;wMel cifA vs [M;-]nos-GAL4:VP16;wMel cifA;cifB x [F;-] nos-GAL4:VP16	ns	>0.9999	Kruskal-Wallis with Dunn's multiple correction test
Fig 2C	[M;-]nos-GAL4:VP16;wMel cifA;cifB x [F;-]nos-GAL4:VP16;wt vs [M;-]nos-GAL4:VP16;wMel cifA;cifB x [F;-] nos-GAL4:VP16	****	<0.0001	Kruskal-Wallis with Dunn's multiple correction test
	[M;-]nos-GAL4:VP16;wMel cifA; wRec cifB x [F;-]nos-GAL4:VP16;wt vs [M;-]nos-GAL4:VP16;wMel cifA;cifB x [F;-] nos-GAL4:VP16	***	0.0008	Kruskal-Wallis with Dunn's multiple correction test
	[M;-]nos-GAL4:VP16;wMel cifA;cifB x [F;-]nos-GAL4:VP16;wRec cifA vs [M;-]nos-GAL4:VP16;wMel cifA;cifB x [F;-] nos-GAL4:VP16	ns	0.0774	Kruskal-Wallis with Dunn's multiple correction test
	[M;-]nos-GAL4:VP16;wMel cifA; wRec cifB x [F;-]nos-GAL4:VP16;wRec cifA vs [M;-]nos-GAL4:VP16;wMel cifA;cifB x [F;-] nos-GAL4:VP16	ns	>0.9999	Kruskal-Wallis with Dunn's multiple correction test
	[M;-]nos-GAL4:VP16;wMel cifA; wRec cifB x [F;-]nos-GAL4:VP16;wMel cifA vs [M;-]nos-GAL4:VP16;wMel cifA;cifB x [F;-] nos-GAL4:VP16	ns	>0.9999	Kruskal-Wallis with Dunn's multiple correction test
Fig 2D	[M;-]nos-GAL4:VP16;wMel cifA;cifB x [F;-]nos-GAL4:VP16;wt vs [M;-]nos-GAL4:VP16;wMel cifA;cifB x [F;-] nos-GAL4:VP16	****	<0.0001	Kruskal-Wallis with Dunn's multiple correction test
	[M;-]nos-GAL4:VP16;wRec cifA; wMel cifB x [F;-]nos-GAL4:VP16;wt vs [M;-]nos-GAL4:VP16;wMel cifA;cifB x [F;-] nos-GAL4:VP16	****	<0.0001	Kruskal-Wallis with Dunn's multiple correction test
	[M;-]nos-GAL4:VP16;wMel cifA;cifB x [F;-]nos-GAL4:VP16;wRec cifA vs [M;-]nos-GAL4:VP16;wMel cifA;cifB x [F;-] nos-GAL4:VP16	ns	>0.9999	Kruskal-Wallis with Dunn's multiple correction test
	[M;-]nos-GAL4:VP16;wRec cifA; wMel cifB x [F;-]nos-GAL4:VP16;wRec cifA vs [M;-]nos-GAL4:VP16;wMel cifA;cifB x [F;-] nos-GAL4:VP16	ns	>0.9999	Kruskal-Wallis with Dunn's multiple correction test
	[M;-]nos-GAL4:VP16;wRec cifA; wMel cifB x [F;-]nos-GAL4:VP16;wMel cifA vs [M;-]nos-GAL4:VP16;wMel cifA;cifB x [F;-] nos-GAL4:VP16	ns	>0.9999	Kruskal-Wallis with Dunn's multiple correction test
Fig 3B	[M;-]nos-GAL4:VP16;wMel cifA;cifB x [F;-]nos-GAL4:VP16;wt vs [M;-]nos-GAL4:VP16;wMel cifA;cifB x [F;-] nos-GAL4:VP16	****	<0.0001	Kruskal-Wallis with Dunn's multiple correction test
	[M;-]nos-GAL4:VP16;wRi cifAT1 x [F;-]nos-GAL4:VP16;wt vs [M;-]nos-GAL4:VP16;wMel cifA;cifB x [F;-] nos-GAL4:VP16	ns	>0.9999	Kruskal-Wallis with Dunn's multiple correction test
	[M;-]nos-GAL4:VP16;wRi cifBT1[T2A] x [F;-]nos-GAL4:VP16;wt vs [M;-]nos-GAL4:VP16;wMel cifA;cifB x [F;-] nos-GAL4:VP16	ns	>0.9999	Kruskal-Wallis with Dunn's multiple correction test
	[M;-]nos-GAL4:VP16;wRi cifAT1;cifBT1[T2A] x [F;-]nos-GAL4:VP16;wt vs [M;-]nos-GAL4:VP16;wMel cifA;cifB x [F;-] nos-GAL4:VP16	ns	0.5495	Kruskal-Wallis with Dunn's multiple correction test
	[M;-]nos-GAL4:VP16;wMel cifA;cifB x [F;-]nos-GAL4:VP16;wRi cifAT1 vs [M;-]nos-GAL4:VP16;wMel cifA;cifB x [F;-] nos-GAL4:VP16	ns	>0.9999	Kruskal-Wallis with Dunn's multiple correction test
	[M;-]nos-GAL4:VP16;wRi cifBT1[T2A] x [F;-]nos-GAL4:VP16;wRi cifAT1 vs [M;-]nos-GAL4:VP16;wMel cifA;cifB x [F;-] nos-GAL4:VP16	ns	>0.9999	Kruskal-Wallis with Dunn's multiple correction test
	[M;-]nos-GAL4:VP16;wRi cifAT1;cifBT1[T2A] x [F;-]nos-GAL4:VP16;wRi cifAT1 vs [M;-]nos-GAL4:VP16;wMel cifA;cifB x [F;-] nos-GAL4:VP16	ns	>0.9999	Kruskal-Wallis with Dunn's multiple correction test
	[M;-]nos-GAL4:VP16;wMel cifA;cifB x [F;-]nos-GAL4:VP16;wRi cifAT1;cifBT1[T2A] vs [M;-]nos-GAL4:VP16;wMel cifA;cifB x [F;-] nos-GAL4:VP16	ns	>0.9999	Kruskal-Wallis with Dunn's multiple correction test
	[M;-]nos-GAL4:VP16;wRi cifBT1[T2A] x [F;-]nos-GAL4:VP16;wRi cifAT1;cifBT1[T2A] vs [M;-]nos-GAL4:VP16;wMel cifA;cifB x [F;-] nos-GAL4:VP16	ns	>0.9999	Kruskal-Wallis with Dunn's multiple correction test
	[M;-]nos-GAL4:VP16;wRi cifAT1;cifBT1[T2A] x [F;-]nos-GAL4:VP16;wRi cifAT1;cifBT1[T2A] vs [M;-]nos-GAL4:VP16;wMel cifA;cifB x [F;-] nos-GAL4:VP16	ns	>0.9999	Kruskal-Wallis with Dunn's multiple correction test
	[M;-]nos-GAL4:VP16;wRi cifBT1[T2A] x [F;-]nos-GAL4:VP16;wMel cifA vs [M;-]nos-GAL4:VP16;wMel cifA;cifB x [F;-] nos-GAL4:VP16	ns	>0.9999	Kruskal-Wallis with Dunn's multiple correction test
	[M;-]nos-GAL4:VP16;wRi cifAT1;cifBT1[T2A] x [F;-]nos-GAL4:VP16;wMel cifA vs [M;-]nos-GAL4:VP16;wMel cifA;cifB x [F;-] nos-GAL4:VP16	ns	>0.9999	Kruskal-Wallis with Dunn's multiple correction test
Fig 3C	[M;-]nos-GAL4:VP16;wMel cifA;cifB x [F;-]nos-GAL4:VP16;wt vs [M;-]nos-GAL4:VP16;wMel cifA;cifB x [F;-] nos-GAL4:VP16	****	<0.0001	Kruskal-Wallis with Dunn's multiple correction test
	[M;-]nos-GAL4:VP16;wMel cifA; wRi cifB[T2A] x [F;-]nos-GAL4:VP16;wt vs [M;-]nos-GAL4:VP16;wMel cifA;cifB x [F;-] nos-GAL4:VP16	ns	>0.9999	Kruskal-Wallis with Dunn's multiple correction test
	[M;-]nos-GAL4:VP16;wMel cifA;cifB x [F;-]nos-GAL4:VP16;wRi cifA[T1] vs [M;-]nos-GAL4:VP16;wMel cifA;cifB x [F;-] nos-GAL4:VP16	ns	>0.9999	Kruskal-Wallis with Dunn's multiple correction test
	[M;-]nos-GAL4:VP16;wMel cifA; wRi cifB[T2A] x [F;-]nos-GAL4:VP16;wRi cifA[T1] vs [M;-]nos-GAL4:VP16;wMel cifA;cifB x [F;-] nos-GAL4:VP16	ns	0.6733	Kruskal-Wallis with Dunn's multiple correction test
	[M;-]nos-GAL4:VP16;wMel cifA; wRi cifB[T2A] x [F;-]nos-GAL4:VP16;wMel cifA vs [M;-]nos-GAL4:VP16;wMel cifA;cifB x [F;-] nos-GAL4:VP16	ns	>0.9999	Kruskal-Wallis with Dunn's multiple correction test
Fig 3D	[M;-]nos-GAL4:VP16;wMel cifA;cifB x [F;-]nos-GAL4:VP16;wt vs [M;-]nos-GAL4:VP16;wMel cifA;cifB x [F;-] nos-GAL4:VP16	****	<0.0001	Kruskal-Wallis with Dunn's multiple correction test
	[M;-]nos-GAL4:VP16;wRi cifA; wMel cifB x [F;-]nos-GAL4:VP16;wt vs [M;-]nos-GAL4:VP16;wMel cifA;cifB x [F;-] nos-GAL4:VP16	****	<0.0001	Kruskal-Wallis with Dunn's multiple correction test
	[M;-]nos-GAL4:VP16;wMel cifA;cifB x [F;-]nos-GAL4:VP16;wRi cifA[T1] vs [M;-]nos-GAL4:VP16;wMel cifA;cifB x [F;-] nos-GAL4:VP16	ns	>0.9999	Kruskal-Wallis with Dunn's multiple correction test
	[M;-]nos-GAL4:VP16;wRi cifA; wMel cifB x [F;-]nos-GAL4:VP16;wRi cifA[T1] vs [M;-]nos-GAL4:VP16;wMel cifA;cifB x [F;-] nos-GAL4:VP16	ns	>0.9999	Kruskal-Wallis with Dunn's multiple correction test
	[M;-]nos-GAL4:VP16;wRi cifA; wMel cifB x [F;-]nos-GAL4:VP16;wMel cifA vs [M;-]nos-GAL4:VP16;wMel cifA;cifB x [F;-] nos-GAL4:VP16	ns	>0.9999	Kruskal-Wallis with Dunn's multiple correction test
Fig 4B	[M;-]nos-GAL4:VP16;wMel cifA;cifB x [F;-]nos-GAL4:VP16;wt vs [M;-]nos-GAL4:VP16;wMel cifA;cifB x [F;-] nos-GAL4:VP16	****	<0.0001	Kruskal-Wallis with Dunn's multiple correction test
	[M;-]nos-GAL4:VP16;wRi cifAT2 x [F;-]nos-GAL4:VP16;wt vs [M;-]nos-GAL4:VP16;wMel cifA;cifB x [F;-] nos-GAL4:VP16	ns	0.8373	Kruskal-Wallis with Dunn's multiple correction test
	[M;-]nos-GAL4:VP16;wRi cifBT2 x [F;-]nos-GAL4:VP16;wt vs [M;-]nos-GAL4:VP16;wMel cifA;cifB x [F;-] nos-GAL4:VP16	ns	0.1333	Kruskal-Wallis with Dunn's multiple correction test
	[M;-]nos-GAL4:VP16;wRi cifAT2;cifBT2 x [F;-]nos-GAL4:VP16;wt vs [M;-]nos-GAL4:VP16;wMel cifA;cifB x [F;-] nos-GAL4:VP16	*	0.0115	Kruskal-Wallis with Dunn's multiple correction test
	[M;-]nos-GAL4:VP16;wMel cifA;cifB x [F;-]nos-GAL4:VP16;wRi cifAT2 vs [M;-]nos-GAL4:VP16;wMel cifA;cifB x [F;-] nos-GAL4:VP16	****	<0.0001	Kruskal-Wallis with Dunn's multiple correction test
	[M;-]nos-GAL4:VP16;wRi cifBT2 x [F;-]nos-GAL4:VP16;wRi cifAT2 vs [M;-]nos-GAL4:VP16;wMel cifA;cifB x [F;-] nos-GAL4:VP16	ns	>0.9999	Kruskal-Wallis with Dunn's multiple correction test
	[M;-]nos-GAL4:VP16;wRi cifAT2;cifBT2 x [F;-]nos-GAL4:VP16;wRi cifAT2 vs [M;-]nos-GAL4:VP16;wMel cifA;cifB x [F;-] nos-GAL4:VP16	ns	>0.9999	Kruskal-Wallis with Dunn's multiple correction test
	[M;-]nos-GAL4:VP16;wMel cifA;cifB x [F;-]nos-GAL4:VP16;wRi cifAT2;cifBT2 vs [M;-]nos-GAL4:VP16;wMel cifA;cifB x [F;-] nos-GAL4:VP16	****	<0.0001	Kruskal-Wallis with Dunn's multiple correction test
	[M;-]nos-GAL4:VP16;wRi cifBT2 x [F;-]nos-GAL4:VP16;wRi cifAT2;cifBT2 vs [M;-]nos-GAL4:VP16;wMel cifA;cifB x [F;-] nos-GAL4:VP16	ns	0.0941	Kruskal-Wallis with Dunn's multiple correction test
	[M;-]nos-GAL4:VP16;wRi cifAT2;cifBT2 x [F;-]nos-GAL4:VP16;wRi cifAT2;cifBT2 vs [M;-]nos-GAL4:VP16;wMel cifA;cifB x [F;-] nos-GAL4:VP16	ns	0.1519	Kruskal-Wallis with Dunn's multiple correction test
	[M;-]nos-GAL4:VP16;wRi cifBT2 x [F;-]nos-GAL4:VP16;wMel cifA vs [M;-]nos-GAL4:VP16;wMel cifA;cifB x [F;-] nos-GAL4:VP16	ns	>0.9999	Kruskal-Wallis with Dunn's multiple correction test
	[M;-]nos-GAL4:VP16;wRi cifAT2;cifBT2 x [F;-]nos-GAL4:VP16;wMel cifA vs [M;-]nos-GAL4:VP16;wMel cifA;cifB x [F;-] nos-GAL4:VP16	ns	>0.9999	Kruskal-Wallis with Dunn's multiple correction test
Fig 4C	[M;-]nos-GAL4:VP16;wMel cifA;cifB x [F;-]nos-GAL4:VP16;wt vs [M;-]nos-GAL4:VP16;wMel cifA;cifB x [F;-] nos-GAL4:VP16	****	<0.0001	Kruskal-Wallis with Dunn's multiple correction test
	[M;-]nos-GAL4:VP16;wMel cifA; wRi cifB[T2] x [F;-]nos-GAL4:VP16;wt vs [M;-]nos-GAL4:VP16;wMel cifA;cifB x [F;-] nos-GAL4:VP16	*	0.0131	Kruskal-Wallis with Dunn's multiple correction test
	[M;-]nos-GAL4:VP16;wMel cifA;cifB x [F;-]nos-GAL4:VP16;wRi cifA[T2] vs [M;-]nos-GAL4:VP16;wMel cifA;cifB x [F;-] nos-GAL4:VP16	****	<0.0001	Kruskal-Wallis with Dunn's multiple correction test
	[M;-]nos-GAL4:VP16;wMel cifA; wRi cifB[T2] x [F;-]nos-GAL4:VP16;wRi cifA[T2] vs [M;-]nos-GAL4:VP16;wMel cifA;cifB x [F;-] nos-GAL4:VP16	ns	>0.9999	Kruskal-Wallis with Dunn's multiple correction test
	[M;-]nos-GAL4:VP16;wMel cifA; wRi cifB[T2] x [F;-]nos-GAL4:VP16;wMel cifA vs [M;-]nos-GAL4:VP16;wMel cifA;cifB x [F;-] nos-GAL4:VP16	ns	0.3971	Kruskal-Wallis with Dunn's multiple correction test
Fig 4D	[M;-]nos-GAL4:VP16;wMel cifA;cifB x [F;-]nos-GAL4:VP16;wt vs [M;-]nos-GAL4:VP16;wMel cifA;cifB x [F;-] nos-GAL4:VP16	****	<0.0001	Kruskal-Wallis with Dunn's multiple correction test
	[M;-]nos-GAL4:VP16;wRi cifA[T2]; wMel cifB x [F;-]nos-GAL4:VP16;wt vs [M;-]nos-GAL4:VP16;wMel cifA;cifB x [F;-] nos-GAL4:VP16	ns	0.0712	Kruskal-Wallis with Dunn's multiple correction test
	[M;-]nos-GAL4:VP16;wMel cifA;cifB x [F;-]nos-GAL4:VP16;wRi cifA[T2] vs [M;-]nos-GAL4:VP16;wMel cifA;cifB x [F;-] nos-GAL4:VP16	****	<0.0001	Kruskal-Wallis with Dunn's multiple correction test
	[M;-]nos-GAL4:VP16;wRi cifA[T2]; wMel cifB x [F;-]nos-GAL4:VP16;wRi cifA[T2] vs [M;-]nos-GAL4:VP16;wMel cifA;cifB x [F;-] nos-GAL4:VP16	ns	0.8804	Kruskal-Wallis with Dunn's multiple correction test
	[M;-]nos-GAL4:VP16;wRi cifA[T2]; wMel cifB x [F;-]nos-GAL4:VP16;wMel cifA vs [M;-]nos-GAL4:VP16;wMel cifA;cifB x [F;-] nos-GAL4:VP16	ns	>0.9999	Kruskal-Wallis with Dunn's multiple correction test
Fig S1	[M;-]nos-GAL4:VP16;cifAmel;cifBmel x [F;-]nos-GAL4:VP16wt vs [M;-]nos-GAL4:VP16;wMel cifA;cifB x [F;+]wt	****	<0.0001	Kruskal-Wallis with Dunn's multiple correction test
	[M;-]nos-GAL4:VP16;cifArec x [F;-]nos-GAL4:VP16wt vs [M;-]nos-GAL4:VP16;wMel cifA;cifB x [F;+]wt	ns	>0.9999	Kruskal-Wallis with Dunn's multiple correction test
	[M;-]nos-GAL4:VP16;cifBrec x [F;-]nos-GAL4:VP16wt vs [M;-]nos-GAL4:VP16;wMel cifA;cifB x [F;+]wt	****	<0.0001	Kruskal-Wallis with Dunn's multiple correction test
	[M;-]nos-GAL4:VP16;cifAmel;cifBmel x [F;-]nos-GAL4:VP16wt vs [M;-]nos-GAL4:VP16;wMel cifA;cifB x [F;+]wt	ns	0.681	Kruskal-Wallis with Dunn's multiple correction test
	[M;-]nos-GAL4:VP16;cifAmel;cifBmel x [F;-]nos-GAL4:VP16;cifArec vs [M;-]nos-GAL4:VP16;wMel cifA;cifB x [F;+]wt	ns	>0.9999	Kruskal-Wallis with Dunn's multiple correction test
	[M;-]nos-GAL4:VP16;cifBrec x [F;-]nos-GAL4:VP16;cifArec vs [M;-]nos-GAL4:VP16;wMel cifA;cifB x [F;+]wt	****	<0.0001	Kruskal-Wallis with Dunn's multiple correction test
	[M;-]nos-GAL4:VP16;cifAmel;cifBmel x [F;-]nos-GAL4:VP16;cifArec vs [M;-]nos-GAL4:VP16;wMel cifA;cifB x [F;+]wt	ns	>0.9999	Kruskal-Wallis with Dunn's multiple correction test
	[M;-]nos-GAL4:VP16;cifBrec x [F;+]wt vs [M;-]nos-GAL4:VP16;wMel cifA;cifB x [F;+]wt	***	0.0001	Kruskal-Wallis with Dunn's multiple correction test
	[M;-]nos-GAL4:VP16;cifAmel;cifBmel x [F;+]wt vs [M;-]nos-GAL4:VP16;wMel cifA;cifB x [F;+]wt	ns	0.7525	Kruskal-Wallis with Dunn's multiple correction test
Fig 2	[M;-]nos-GAL4:VP16;wMel cifA;cifB x [F;-]nos-GAL4:VP16;wt vs [M;-]nos-GAL4:VP16;wMel cifA;cifB x [F;-]nos-GAL4:VP16;wRec cifA; cifB	Yes	0.0285	Fisher's exact test with Bonferroni-Dunn correction test (p-values less than 0.0033 are significant)
	[M;-]nos-GAL4:VP16;wMel cifA;cifB x [F;-]nos-GAL4:VP16;wt vs [M;-]nos-GAL4:VP16;wMel cifA;cifB x [F;-]nos-GAL4:VP16;wMel cifA	Yes	0.0015	Fisher's exact test with Bonferroni-Dunn correction test (p-values less than 0.0033 are significant)
	[M;-]nos-GAL4:VP16;wMel cifA;cifB x [F;-]nos-GAL4:VP16;wt vs [M;-]nos-GAL4:VP16;wRec cifB x [F;-]nos-GAL4:VP16;wt	No	0.054	Fisher's exact test with Bonferroni-Dunn correction test (p-values less than 0.0033 are significant)
	[M;-]nos-GAL4:VP16;wMel cifA;cifB x [F;-]nos-GAL4:VP16;wt vs [M;-]nos-GAL4:VP16;wRec cifB x [F;-]nos-GAL4:VP16;wRec cifA; cifB	Yes	0.0015	Fisher's exact test with Bonferroni-Dunn correction test (p-values less than 0.0033 are significant)
	[M;-]nos-GAL4:VP16;wMel cifA;cifB x [F;-]nos-GAL4:VP16;wt vs [M;-]nos-GAL4:VP16;wRec cifB x [F;-]nos-GAL4:VP16;wMel cifA	Yes	0.003	Fisher's exact test with Bonferroni-Dunn correction test (p-values less than 0.0033 are significant)
	[M;-]nos-GAL4:VP16;wMel cifA;cifB x [F;-]nos-GAL4:VP16;wRec cifA; cifB vs [M;-]nos-GAL4:VP16;wMel cifA;cifB x [F;-]nos-GAL4:VP16;wMel cifA	Yes	0.0015	Fisher's exact test with Bonferroni-Dunn correction test (p-values less than 0.0033 are significant)
	[M;-]nos-GAL4:VP16;wMel cifA;cifB x [F;-]nos-GAL4:VP16;wRec cifA; cifB vs [M;-]nos-GAL4:VP16;wRec cifB x [F;-]nos-GAL4:VP16;wt	No	1	Fisher's exact test with Bonferroni-Dunn correction test (p-values less than 0.0033 are significant)
	[M;-]nos-GAL4:VP16;wMel cifA;cifB x [F;-]nos-GAL4:VP16;wRec cifA; cifB vs [M;-]nos-GAL4:VP16;wRec cifB x [F;-]nos-GAL4:VP16;wRec cifA; cifB	Yes	0.0015	Fisher's exact test with Bonferroni-Dunn correction test (p-values less than 0.0033 are significant)
	[M;-]nos-GAL4:VP16;wMel cifA;cifB x [F;-]nos-GAL4:VP16;wRec cifA; cifB vs [M;-]nos-GAL4:VP16;wRec cifB x [F;-]nos-GAL4:VP16;wMel cifA	No	1	Fisher's exact test with Bonferroni-Dunn correction test (p-values less than 0.0033 are significant)
	[M;-]nos-GAL4:VP16;wMel cifA;cifB x [F;-]nos-GAL4:VP16;wMel cifA vs [M;-]nos-GAL4:VP16;wRec cifB x [F;-]nos-GAL4:VP16;wt	Yes	0.0015	Fisher's exact test with Bonferroni-Dunn correction test (p-values less than 0.0033 are significant)
	[M;-]nos-GAL4:VP16;wMel cifA;cifB x [F;-]nos-GAL4:VP16;wMel cifA vs [M;-]nos-GAL4:VP16;wRec cifB x [F;-]nos-GAL4:VP16;wRec cifA; cifB	No	1	Fisher's exact test with Bonferroni-Dunn correction test (p-values less than 0.0033 are significant)
	[M;-]nos-GAL4:VP16;wMel cifA;cifB x [F;-]nos-GAL4:VP16;wMel cifA vs [M;-]nos-GAL4:VP16;wRec cifB x [F;-]nos-GAL4:VP16;wMel cifA	Yes	0.0015	Fisher's exact test with Bonferroni-Dunn correction test (p-values less than 0.0033 are significant)
	[M;-]nos-GAL4:VP16;wRec cifB x [F;-]nos-GAL4:VP16;wt vs [M;-]nos-GAL4:VP16;wRec cifB x [F;-]nos-GAL4:VP16;wRec cifA; cifB	Yes	0.0015	Fisher's exact test with Bonferroni-Dunn correction test (p-values less than 0.0033 are significant)
	[M;-]nos-GAL4:VP16;wRec cifB x [F;-]nos-GAL4:VP16;wt vs [M;-]nos-GAL4:VP16;wRec cifB x [F;-]nos-GAL4:VP16;wMel cifA	No	1	Fisher's exact test with Bonferroni-Dunn correction test (p-values less than 0.0033 are significant)
	[M;-]nos-GAL4:VP16;wRec cifB x [F;-]nos-GAL4:VP16;wRec cifA; cifB vs [M;-]nos-GAL4:VP16;wRec cifB x [F;-]nos-GAL4:VP16;wMel cifA	Yes	0.0015	Fisher's exact test with Bonferroni-Dunn correction test (p-values less than 0.0033 are significant)
Fig S3A	[M;-]nos-GAL4:VP16;wMel cifA;cifB x [F;-]nos-GAL4:VP16;wt vs [M;-]nos-GAL4:VP16;wMel cifA;cifB x [F;-] nos-GAL4:VP16	****	<0.0001	Kruskal-Wallis with Dunn's multiple correction test
	[M;-]nos-GAL4:VP16;wRi cifAT1 x [F;-]nos-GAL4:VP16;wt vs [M;-]nos-GAL4:VP16;wMel cifA;cifB x [F;-] nos-GAL4:VP16	ns	0.2543	Kruskal-Wallis with Dunn's multiple correction test
	[M;-]nos-GAL4:VP16;wRi cifBT1[T1;N] x [F;-]nos-GAL4:VP16;wt vs [M;-]nos-GAL4:VP16;wMel cifA;cifB x [F;-] nos-GAL4:VP16	ns	0.5552	Kruskal-Wallis with Dunn's multiple correction test
	[M;-]nos-GAL4:VP16;wRi cifAT1;cifBT1[T1;N] x [F;-]nos-GAL4:VP16;wt vs [M;-]nos-GAL4:VP16;wMel cifA;cifB x [F;-] nos-GAL4:VP16	ns	>0.9999	Kruskal-Wallis with Dunn's multiple correction test
	[M;-]nos-GAL4:VP16;wMel cifA;cifB x [F;-]nos-GAL4:VP16;wRi cifAT1 vs [M;-]nos-GAL4:VP16;wMel cifA;cifB x [F;-] nos-GAL4:VP16	ns	>0.9999	Kruskal-Wallis with Dunn's multiple correction test
	[M;-]nos-GAL4:VP16;wRi cifBT1[T1;N] x [F;-]nos-GAL4:VP16;wRi cifAT1 vs [M;-]nos-GAL4:VP16;wMel cifA;cifB x [F;-] nos-GAL4:VP16	ns	>0.9999	Kruskal-Wallis with Dunn's multiple correction test
	[M;-]nos-GAL4:VP16;wRi cifAT1;cifBT1[T1;N] x [F;-]nos-GAL4:VP16;wRi cifAT1 vs [M;-]nos-GAL4:VP16;wMel cifA;cifB x [F;-] nos-GAL4:VP16	ns	>0.9999	Kruskal-Wallis with Dunn's multiple correction test
	[M;-]nos-GAL4:VP16;wMel cifA;cifB x [F;-]nos-GAL4:VP16;wRi cifAT1;cifBT1[T1;N] vs [M;-]nos-GAL4:VP16;wMel cifA;cifB x [F;-] nos-GAL4:VP16	ns	>0.9999	Kruskal-Wallis with Dunn's multiple correction test
	[M;-]nos-GAL4:VP16;wRi cifBT1[T1;N] x [F;-]nos-GAL4:VP16;wRi cifAT1;cifBT1[T1;N] vs [M;-]nos-GAL4:VP16;wMel cifA;cifB x [F;-] nos-GAL4:VP16	ns	0.4774	Kruskal-Wallis with Dunn's multiple correction test
	[M;-]nos-GAL4:VP16;wRi cifAT1;cifBT1[T1;N] x [F;-]nos-GAL4:VP16;wRi cifAT1;cifBT1[T1;N] vs [M;-]nos-GAL4:VP16;wMel cifA;cifB x [F;-] nos-GAL4:VP16	ns	>0.9999	Kruskal-Wallis with Dunn's multiple correction test
	[M;-]nos-GAL4:VP16;wRi cifBT1[T1;N] x [F;-]nos-GAL4:VP16;wMel cifA vs [M;-]nos-GAL4:VP16;wMel cifA;cifB x [F;-] nos-GAL4:VP16	ns	>0.9999	Kruskal-Wallis with Dunn's multiple correction test
	[M;-]nos-GAL4:VP16;wRi cifAT1;cifBT1[T1;N] x [F;-]nos-GAL4:VP16;wMel cifA vs [M;-]nos-GAL4:VP16;wMel cifA;cifB x [F;-] nos-GAL4:VP16	ns	>0.9999	Kruskal-Wallis with Dunn's multiple correction test
Fig S3B	[M;-]nos-GAL4:VP16;wMel cifA;cifB x [F;-]nos-GAL4:VP16;wt vs [M;-]nos-GAL4:VP16;wMel cifA;cifB x [F;-] nos-GAL4:VP16	****	<0.0001	Kruskal-Wallis with Dunn's multiple correction test
	[M;-]nos-GAL4:VP16;wMel cifA;wRi cifB[T1;N] x [F;-]nos-GAL4:VP16;wt vs [M;-]nos-GAL4:VP16;wMel cifA;cifB x [F;-] nos-GAL4:VP16	ns	>0.9999	Kruskal-Wallis with Dunn's multiple correction test
	[M;-]nos-GAL4:VP16;wMel cifA;cifB x [F;-]nos-GAL4:VP16;wRi cifA[T1] vs [M;-]nos-GAL4:VP16;wMel cifA;cifB x [F;-] nos-GAL4:VP16	ns	>0.9999	Kruskal-Wallis with Dunn's multiple correction test
	[M;-]nos-GAL4:VP16;wMel cifA;wRi cifB[T1;N] x [F;-]nos-GAL4:VP16;wRi cifA[T1] vs [M;-]nos-GAL4:VP16;wMel cifA;cifB x [F;-] nos-GAL4:VP16	ns	>0.9999	Kruskal-Wallis with Dunn's multiple correction test
	[M;-]nos-GAL4:VP16;wMel cifA;wRi cifB[T1;N] x [F;-]nos-GAL4:VP16;wMel cifA vs [M;-]nos-GAL4:VP16;wMel cifA;cifB x [F;-] nos-GAL4:VP16	ns	0.9644	Kruskal-Wallis with Dunn's multiple correction test
Fig S4A	[M;-]nos-GAL4:VP16;wMel cifA;cifB x [F;-]nos-GAL4:VP16;wt vs [M;-]nos-GAL4:VP16;wMel cifA;cifB x [F;-] nos-GAL4:VP16	****	<0.0001	Kruskal-Wallis with Dunn's multiple correction test
	[M;-]nos-GAL4:VP16;wRi cifBT1[T1;C] x [F;-]nos-GAL4:VP16;wt vs [M;-]nos-GAL4:VP16;wMel cifA;cifB x [F;-] nos-GAL4:VP16	ns	>0.9999	Kruskal-Wallis with Dunn's multiple correction test
	[M;-]nos-GAL4:VP16;wRi cifAT1;cifBT1[T1;C] x [F;-]nos-GAL4:VP16;wt vs [M;-]nos-GAL4:VP16;wMel cifA;cifB x [F;-] nos-GAL4:VP16	ns	0.315	Kruskal-Wallis with Dunn's multiple correction test
	[M;-]nos-GAL4:VP16;wMel cifA;cifB x [F;-]nos-GAL4:VP16;wRi cifAT1 vs [M;-]nos-GAL4:VP16;wMel cifA;cifB x [F;-] nos-GAL4:VP16	ns	>0.9999	Kruskal-Wallis with Dunn's multiple correction test
	[M;-]nos-GAL4:VP16;wRi cifBT1[T1;C] x [F;-]nos-GAL4:VP16;wRi cifAT1 vs [M;-]nos-GAL4:VP16;wMel cifA;cifB x [F;-] nos-GAL4:VP16	ns	>0.9999	Kruskal-Wallis with Dunn's multiple correction test
	[M;-]nos-GAL4:VP16;wRi cifAT1;cifBT1[T1;C] x [F;-]nos-GAL4:VP16;wRi cifAT1 vs [M;-]nos-GAL4:VP16;wMel cifA;cifB x [F;-] nos-GAL4:VP16	ns	>0.9999	Kruskal-Wallis with Dunn's multiple correction test
	[M;-]nos-GAL4:VP16;wMel cifA;cifB x [F;-]nos-GAL4:VP16;wRi cifAT1;cifBT1[T1;C] vs [M;-]nos-GAL4:VP16;wMel cifA;cifB x [F;-] nos-GAL4:VP16	ns	>0.9999	Kruskal-Wallis with Dunn's multiple correction test
	[M;-]nos-GAL4:VP16;wRi cifBT1[T1;C] x [F;-]nos-GAL4:VP16;wRi cifAT1;cifBT1[T1;C] vs [M;-]nos-GAL4:VP16;wMel cifA;cifB x [F;-] nos-GAL4:VP16	ns	>0.9999	Kruskal-Wallis with Dunn's multiple correction test
	[M;-]nos-GAL4:VP16;wRi cifAT1;cifBT1[T1;C] x [F;-]nos-GAL4:VP16;wRi cifAT1;cifBT1[T1;C] vs [M;-]nos-GAL4:VP16;wMel cifA;cifB x [F;-] nos-GAL4:VP16	ns	>0.9999	Kruskal-Wallis with Dunn's multiple correction test
	[M;-]nos-GAL4:VP16;wRi cifBT1[T1;C] x [F;-]nos-GAL4:VP16;wMel cifA vs [M;-]nos-GAL4:VP16;wMel cifA;cifB x [F;-] nos-GAL4:VP16	ns	>0.9999	Kruskal-Wallis with Dunn's multiple correction test
	[M;-]nos-GAL4:VP16;wRi cifAT1;cifBT1[T1;C] x [F;-]nos-GAL4:VP16;wMel cifA vs [M;-]nos-GAL4:VP16;wMel cifA;cifB x [F;-] nos-GAL4:VP16	ns	>0.9999	Kruskal-Wallis with Dunn's multiple correction test
Fig S4B	[M;-]nos-GAL4:VP16;wMel cifA;cifB x [F;-]nos-GAL4:VP16;wt vs [M;-]nos-GAL4:VP16;wMel cifA;cifB x [F;-] nos-GAL4:VP16	****	<0.0001	Kruskal-Wallis with Dunn's multiple correction test
	[M;-]nos-GAL4:VP16;wMel cifA;wRi cifB[T1;C] x [F;-]nos-GAL4:VP16;wt vs [M;-]nos-GAL4:VP16;wMel cifA;cifB x [F;-] nos-GAL4:VP16	ns	>0.9999	Kruskal-Wallis with Dunn's multiple correction test
	[M;-]nos-GAL4:VP16;wMel cifA;cifB x [F;-]nos-GAL4:VP16;wRi cifA[T1] vs [M;-]nos-GAL4:VP16;wMel cifA;cifB x [F;-] nos-GAL4:VP16	ns	>0.9999	Kruskal-Wallis with Dunn's multiple correction test
	[M;-]nos-GAL4:VP16;wMel cifA;wRi cifB[T1;C] x [F;-]nos-GAL4:VP16;wRi cifA[T1] vs [M;-]nos-GAL4:VP16;wMel cifA;cifB x [F;-] nos-GAL4:VP16	ns	>0.9999	Kruskal-Wallis with Dunn's multiple correction test
	[M;-]nos-GAL4:VP16;wMel cifA;wRi cifB[T1;C] x [F;-]nos-GAL4:VP16;wMel cifA vs [M;-]nos-GAL4:VP16;wMel cifA;cifB x [F;-] nos-GAL4:VP16	ns	>0.9999	Kruskal-Wallis with Dunn's multiple correction test

## Sheet: Table S2
Table S2. Wild-type and optimized cif nucleotide sequences. Codon optimized sequences are noted with the _opt tag at the end of the gene name.
Gene name	Sequence
cifA_wMel	ATGCCAATAGAAACAAAACGTCAGGCTGAAGTGCTTAAAAAGCTACAAGATGTGATAAAACATACAGATCGTGACATTGCGGCTGGAAGAAAGTTAGCTATTAAAAGGTGGGTCGAGACCTATATAGAGTATATCAAACTTTTTAAGGATGATAAGCTGGAATTCTTATATAATGTTTTTCGAGATGAAGGTTGTTGGTTAGGTACAAGGTTAAATAATACTGTTTTAGGTCAGAAATTGACTGAAGAGAAAATAGGAGAAATCGATAACCCACTACCAAGGTATGGTATGGCATCTAGGTACTGTATAACGGGCAAGATAGGTGATTTTTTCAACAAACAGTTTGTACTCTCTAGAGGTCAATTTACTTCAGAAGAGGTAGATAGTCAAGGTAATCCG…
cifA_wMel_opt	ATGCCCATTGAGACAAAGCGCCAGGCCGAGGTGCTGAAGAAGCTGCAGGATGTGATTAAGCATACAGACCGCGATATTGCCGCCGGACGCAAGCTGGCCATCAAGCGCTGGGTGGAGACATACATCGAGTATATTAAGCTGTTCAAGGATGACAAGCTGGAGTTCCTGTACAACGTGTTTCGCGACGAGGGATGCTGGCTGGGCACCCGCCTGAACAATACGGTGCTGGGACAGAAGCTGACCGAGGAGAAGATCGGCGAGATTGATAATCCACTGCCACGCTACGGAATGGCCTCCCGCTATTGCATCACAGGAAAGATTGGCGACTTCTTTAACAAGCAGTTCGTGCTGTCCCGCGGACAGTTTACCTCGGAGGAGGTGGATAGTCAGGGCAACCCA…
cifA_wRec	ATGCCAATAGAAACAAAACGTCAGGCTGAAGTGCTTAAAAAGCTACAAGATGTGATAAAACATACAGATCGTGACATTGCGGCTGGAAGAAAGTTAGCTATTAAAAGGTGGGTCGAGACCTATATAGAGTATATCAAACTTTTTAAGGATGATAAGCTGGAATTCTTATATAATGTTTTTCGAGATGAAGGTTGTTGGTTAGGTACAAGGTTAAATAATACTGTTTTAGGTCAGAAATTGACTGAAGAGAAAATAGGAGAAATCGATAACCCACTACCAAGGTATGGTATGGCATCTAGGTACTGTATAACGGGCAAGATAGGTGATTTTTTCAACAAACAGTTTGTACTCTCTAGAGGTCAATTTACTTCAGAAGAGGTAGATAGTCAAGGTAATCCG…
cifA_wRec_opt	ATGCCAATCGAGACCAAGCGCCAGGCCGAGGTGCTGAAGAAGCTGCAGGATGTGATCAAGCACACCGATCGCGACATTGCCGCCGGACGCAAGCTGGCCATCAAGCGCTGGGTGGAGACCTACATCGAGTACATCAAGCTGTTCAAGGATGACAAGCTGGAGTTCCTGTACAATGTGTTCCGCGATGAGGGATGCTGGCTGGGCACCCGCCTGAACAATACCGTGCTGGGCCAGAAGCTGACCGAGGAGAAGATCGGCGAGATCGATAATCCGCTGCCCCGCTACGGAATGGCCTCCCGCTACTGCATCACCGGCAAGATCGGCGACTTCTTCAACAAGCAGTTCGTGCTGTCCCGCGGACAGTTCACCTCGGAGGAGGTGGATTCCCAGGGCAACCCA…
cifA_wRi[T1]	ATGCCAATAGAAACAAAACGTCAGGCTGAAGTGCTTAAAAAGCTACAAGATGTGATAAAACATACAGATCGTGACATTGCGGCTGGAAGAAAGTTAGCTATTAAAAGGTGGGTCGAGACCTATATAGAGTATATCAAACTTTTTAAGGATGATAAGCTGGAATTCTTATATAATGTTTTTCGAGATGAAGGTTGTTGGTTAGGTACAAGGTTAAATAATACTGTTTTAGGTCAGAAATTGACTGAAGAGAAAATAGGAGAAATCGATAACCCACTACCAAGGTATGGTATGGCATCTAGGTACTGTATAACGGGCAAGATAGGTGATTTTTTCAACAAACAGTTTGTACTCTCTAGAGGTCAATTTACTTCAGAAGAGGTAGATAGTCAAGGTAATCCG…
cifA_wRi[T1]_opt	ATGCCAATCGAGACCAAGCGCCAGGCCGAGGTGCTGAAGAAGCTGCAGGATGTGATCAAGCACACCGATCGCGACATTGCCGCCGGACGCAAGCTGGCCATCAAGCGCTGGGTGGAGACCTACATCGAGTACATCAAGCTGTTCAAGGATGACAAGCTGGAGTTCCTGTACAATGTGTTCCGCGATGAGGGATGCTGGCTGGGCACCCGCCTGAACAATACCGTGCTGGGCCAGAAGCTGACCGAGGAGAAGATCGGCGAGATCGATAATCCGCTGCCCCGCTACGGAATGGCCTCCCGCTACTGCATCACCGGCAAGATCGGCGACTTCTTCAACAAGCAGTTCGTGCTGAGCCGCGGACAGTTCACCTCCGAGGAGGTGGATAGCCAGGGCAACCCA…
cifA_wRi[T2]	ATGCCAAAAAAGATGGAGCGTCATGCTGCAGTGCTTAGTAAGTTAAAGAGTGTTATTCAACATACAGATTCCAAGGTCATGGCTGAAAGGCGTTCAGCTATTGAAAGATGGGTAAAAACTTACATTAGGCAGGTAGAATATCTTAAAGATGATAAGCTACAATTCTTATACAACATATTTCGCGATGAAAGTTGTTGGTCAGGTACGAGATTGAACAATACAATCTTAGGACAGAGGTTTACTGAAGAAAAAATAGGCGAAATAAAGAACCCTCTTCCTATATATGATATGGCATGTCGATACTGCGTGATAGATAAAATTCCTTTGCTCTTTCAGAAGCAGTTTGAATCTTACAAAAGTAGCTTCTCTTCTGAAGAGATAGATGATGATGGTAAGCCT…
cifA_wRi[T2]_opt	ATGCCAAAGAAGATGGAGCGCCACGCCGCCGTGCTGTCCAAGCTGAAGAGCGTGATCCAGCACACCGATTCCAAGGTCATGGCCGAGCGCCGCTCGGCCATTGAGCGCTGGGTGAAGACCTACATCCGCCAGGTGGAGTACCTGAAGGATGACAAGCTGCAGTTCCTGTACAACATCTTCCGCGATGAGAGCTGCTGGTCGGGCACCCGCCTGAACAATACCATCCTGGGCCAGCGCTTCACCGAGGAGAAGATCGGCGAGATCAAGAATCCCCTGCCGATCTACGATATGGCCTGCCGCTACTGCGTGATCGACAAGATCCCCCTGCTGTTCCAGAAGCAGTTCGAGAGCTACAAGAGCTCCTTCTCGAGCGAGGAGATCGATGACGATGGCAAGCCC…
cifB_wMel	GTGGATGGAGATCTTGATGGTTTTAGACAAGAGTTTGAATCCTTTTTAGATCAATGTCCATTTTTCTTGTATCATGTAAGTACAGGACGTTTCCTTCCTGTATTCTTTTTCAGTATGTTTGCTACTGCTCATGATGCTAATATCTTAAAAGCAAATGAGAGAGTGTATTTTCGTTTTGATAATCATGGTATTGATACAGGTGGTAGAAATAGAAATACAGGGAACCTAAAAGTCGCTGTTTATCATGACGGACAGCAAGTTGTCAGATGCTACAGTATTTCTGATCGTCTTAATAGTGATGGGTTAAGGTTCAGTACAAGGGAAAGAAATGCTCTAGTGCGAGAGATTAGAGGGCAAAATCCAAATTTAAGGGAAGAAGACCTAAATTTTGAGCAATAC…
cifB_wMel_opt	ATGGACGGAGACCTGGACGGCTTTCGCCAGGAGTTTGAGAGTTTTCTGGATCAGTGCCCCTTCTTTCTGTATCATGTGAGCACGGGACGCTTTCTGCCCGTGTTCTTTTTCAGCATGTTCGCCACGGCCCATGACGCCAATATTCTGAAGGCCAACGAGCGCGTGTACTTTCGCTTCGACAATCACGGCATCGATACGGGCGGACGCAATCGCAACACAGGAAACCTGAAGGTGGCCGTGTACCATGATGGCCAGCAGGTGGTGCGCTGCTATAGCATTTCCGACCGCCTGAATAGCGATGGACTGCGCTTCTCCACGCGCGAGCGCAACGCCCTGGTGCGCGAGATCCGCGGCCAGAATCCGAACCTGCGCGAGGAGGACCTGAACTTCGAGCAGTAC…
cifB_wRec	GTGTCTTTAATAAGAAGTTTAGTGGATGGAGATCTTGATGGTTTTAGACAAGAGTTTGAATCCTTTTTAGATCAATGTCCATTTTTCTTGTATCATGTAAGTACAGGACGTTTCCTTCCTGTATTCTTTTTCAGTATGTTTGCTACTGCTCATGATGCTAATATCTTAAAAGCAAATGAGAGAGTGTATTTTCGTTTTGATAATCATGGTATTGATACAGGTGGTAGAAATAGAAATACAGGGAACCTAAAAGTCGCTGTTTATCGTGACGGACAGCAAGTTGTCAGATGCTACAGTATTTCTGATCGTCTTAATAGTGATGGGTTAAGGTTCAGTACAAGGGAAAGAAATGCTCTAGTGCGAGAGATTAGAGGGCAAAATCCAAATTTAAGGGAAGAA…
cifB_wRec_opt	ATGAGCCTGATCCGCTCCCTGGTGGATGGCGACCTGGATGGCTTCCGCCAGGAGTTCGAGAGCTTCCTGGATCAGTGCCCGTTCTTCCTGTACCACGTGTCCACCGGCCGCTTCCTGCCAGTGTTCTTCTTCAGCATGTTCGCCACCGCCCACGACGCCAATATCCTGAAGGCCAACGAGCGCGTGTACTTCCGCTTCGATAATCACGGAATTGACACCGGCGGCCGCAATCGCAACACCGGAAACCTGAAGGTGGCCGTGTACCGCGATGGCCAGCAGGTGGTGCGCTGCTACAGCATCTCCGATCGCCTGAATTCGGATGGACTGCGCTTCTCGACCCGCGAGCGCAATGCCCTGGTGCGCGAGATCCGCGGCCAGAATCCCAACCTGCGCGAGGAG…
cifB_wRi[T1]	GTGTCTTTAATAAGAAGTTTAGTGGATGGAGATCTTGATGGTTTTAGACAAGAGTTTGAATCCTTTTTAGATCAATGTCCATTTTTCTTGTATCATGTAAGTACAGGACGTTTCCTTCCTGTATTCTTTTTCAGTATGTTTGCTACTGCTCATGATGCTAATATCTTAAAAGCAAATGAGAGAGTGTATTTTCGTTTTGATAATCATGGTATTGATACAGGTGGTAGAAATAGAAATACAGGGAACCTAAAAGTCGCTGTTTATCGTGACGGACAGCAAGTTGTCAGATGCTACAGTATTTCTGATCGTCTTAATAGTGATGGGTTAAGGTTCAGTACAAGGGAAAGAAATGCTCTAGTGCGAGAGATTAGAGGGCAAAATCCAAATTTAAGGGAAGAA…
cifB_wRi[T1;N]	GTGTCTTTAATAAGAAGTTTAGTGGATGGAGATCTTGATGGTTTTAGACAAGAGTTTGAATCCTTTTTAGATCAATGTCCATTTTTCTTGTATCATGTAAGTACAGGACGTTTCCTTCCTGTATTCTTTTTCAGTATGTTTGCTACTGCTCATGATGCTAATATCTTAAAAGCAAATGAGAGAGTGTATTTTCGTTTTGATAATCATGGTATTGATACAGGTGGTAGAAATAGAAATACAGGGAACCTAAAAGTCGCTGTTTATCGTGACGGACAGCAAGTTGTCAGATGCTACAGTATTTCTGATCGTCTTAATAGTGATGGGTTAAGGTTCAGTACAAGGGAAAGAAATGCTCTAGTGCGAGAGATTAGAGGGCAAAATCCAAATTTAAGGGAAGAA…
cifB_wRi[T1;N]_opt	ATGTCCCTGATCCGCTCGCTGGTGGATGGCGACCTGGATGGCTTCCGCCAGGAGTTCGAGTCGTTCCTGGACCAGTGCCCATTCTTCCTGTACCACGTGTCCACCGGACGCTTCCTGCCAGTGTTCTTCTTCAGCATGTTCGCCACCGCCCACGATGCCAATATCCTGAAGGCCAACGAGCGCGTGTACTTCCGCTTCGACAATCACGGAATTGATACCGGCGGCCGCAACCGCAATACCGGAAACCTGAAGGTGGCCGTGTACCGCGATGGACAGCAGGTGGTGCGCTGCTACAGCATCTCCGACCGCCTGAATTCGGATGGACTGCGCTTCTCGACCCGCGAGCGCAATGCCCTGGTGCGCGAGATCCGCGGCCAGAACCCCAATCTGCGCGAGGAG…
cifB_wRi[T1;C]	GTGCAAGTTGCACCGGGTCAGCAAGGGATTTTCAGTTTTATGGAAGTGCTAGCAAGTAACCAAAGAATAAATATAGAACGTGGAATAAATGAAGGAATTTTGCCATACATAACTCGAATCTATCGTAGTTACCTAGGCAGCCTACAAAATGACATTCAAAATCGCAGTCAAAAGTTTGAGAGTCACGGATTTTTCTTAGGTTTGTTGGCAAATTTTATTCATCTCTACACAATAGATATTGACCTTGACTTGTCTCCTGGAAATTCATATGTTGCTTTTCTTATATGTCATCAGGCAGAGAGAGAAAACATTCCTATCGTTATTAATGTTACTAGATGGAGGACATCGTCTGATATTGCATTAAACCGCGCTAGAGCTGATGCTAAAAGATTACATGCT…
cifB_wRi[T1;C]_opt	ATGCAGGTGGCCCCGGGACAGCAGGGAATCTTCTCCTTCATGGAGGTGCTGGCCTCGAACCAGCGCATCAATATCGAGCGCGGCATCAACGAGGGCATCCTGCCGTACATCACCCGCATCTACCGCTCGTACCTGGGCAGCCTGCAGAACGACATCCAGAATCGCAGCCAGAAGTTCGAGTCCCACGGCTTCTTCCTGGGCCTGCTGGCCAACTTCATCCACCTGTACACCATCGATATCGACCTGGATCTGTCCCCAGGCAATTCGTACGTGGCCTTCCTGATCTGCCACCAGGCCGAGCGCGAGAACATCCCCATCGTGATCAATGTGACCCGCTGGCGCACCAGCTCGGACATTGCCCTGAACCGCGCCCGCGCCGATGCCAAGCGCCTGCACGCC…
cifB_wRi[T1;T2A]_opt	ATGTCCCTGATCCGCTCGCTGGTGGATGGCGACCTGGATGGCTTCCGCCAGGAGTTCGAGTCGTTCCTGGACCAGTGCCCATTCTTCCTGTACCACGTGTCCACCGGACGCTTCCTGCCAGTGTTCTTCTTCAGCATGTTCGCCACCGCCCACGATGCCAATATCCTGAAGGCCAACGAGCGCGTGTACTTCCGCTTCGACAATCACGGAATTGATACCGGCGGCCGCAACCGCAATACCGGAAACCTGAAGGTGGCCGTGTACCGCGATGGACAGCAGGTGGTGCGCTGCTACAGCATCTCCGACCGCCTGAATTCGGATGGACTGCGCTTCTCGACCCGCGAGCGCAATGCCCTGGTGCGCGAGATCCGCGGCCAGAACCCCAATCTGCGCGAGGAG…
cifB_wRi[T2]	ATGCATGGGTTAGTTAGAAGTTTAATAAATGGAAATTGTGGAGAATTCACGGAAAAGTTTGAATATTTCTTGGATTCATGTCCATCTTTTCTGCATTCAGTTGGCAAAGATCACTTTTTTCCTGCGTTCTTTTTTGGCATGTTTGCTACTGCACATGATTCTGGTGTTGCAAACAATGATGAAAGAATCTTCTTTCGTTTTGATAATGATCCAGGTAGTCCTGGAAGGGGAAATCTAAAGGTTGCAATTCTAACAACTGATGGAAATAACAGAAGAGTTGTAAGGTGCTATACTATTGCTGACAGAGAGAATAGCTACGGTTCTAGGTTTAGCCAGCAGGAAAGGGAGCAGCTGGAAGGTATCCTGCGAGATGAAGAGCTTGAATGGCAAGAGTATAAA…
cifB_wRi[T2]_opt	ATGCACGGCCTGGTGCGCTCGCTGATCAACGGCAATTGCGGCGAGTTCACCGAGAAGTTCGAGTACTTCCTGGACTCCTGCCCGTCGTTCCTGCACAGCGTGGGCAAGGATCACTTCTTCCCAGCCTTCTTCTTCGGAATGTTCGCCACCGCCCACGACTCCGGAGTGGCCAACAATGATGAGCGCATCTTCTTCCGCTTCGATAATGACCCCGGAAGCCCAGGACGCGGCAATCTGAAGGTGGCCATCCTGACCACCGACGGCAACAATCGCCGCGTGGTGCGCTGCTACACCATTGCCGATCGCGAGAACAGCTACGGATCCCGCTTCTCCCAGCAGGAGCGCGAGCAGCTGGAGGGAATCCTGCGCGATGAGGAGCTGGAGTGGCAGGAGTACAAG…

## Sheet: Table S3
Table S3. Primers used in this study
Purpose	Associated gene	Primer	Sequence (5' - 3')	Product length, bp
Wolbachia infection check	Wolbachia 16S	Wolb_F	GAAGATAATGACGGTACTCAC	990
		Wolb_R3	GTCACTGATCCCACTTTAAATAAC
Genotyping of transgene optimized cif genes	cifA_wMel[T1]	pTIGMCS_F	GAGGAAAGGTTGTGTGCGGACGA	699
		MelA1208_R	AGCCCTCCACGGCATCGTACTT
		MelA1023_F	ACAAGCAGTTCGTGCTGTCCCG	741
		MelA1763_R	TGCACACATCCTCGCGCTTC
		MelA1667_F	TACCGCGAGACCAGCGTGAA	633
		pTIGMCS_R	CGAATTGGTGCTATGTTTATGGCGCT
	cifA_wRec[T1]	pTIGMCS_F	GAGGAAAGGTTGTGTGCGGACGA	699
		MelA1208_R	AGCCCTCCACGGCATCGTACTT
		RecA986_F	CGCTACTGCATCACCGGCAAGA	900
		RecA1885_R	TGCAAGCCAGACCGCGAGAT
		RecA1760_F	TGCAAGCCAGACCGCGAGAT	540
		pTIGMCS_R	CGAATTGGTGCTATGTTTATGGCGCT
	cifA_wRi[T1]	pTIGMCS_F	GAGGAAAGGTTGTGTGCGGACGA	699
		MelA1208_R	AGCCCTCCACGGCATCGTACTT
		RecA986_F	CGCTACTGCATCACCGGCAAGA	778
		MelA1763_R	TGCACACATCCTCGCGCTTC
		MelA1667_F	TACCGCGAGACCAGCGTGAA	633
		pTIGMCS_R	CGAATTGGTGCTATGTTTATGGCGCT
	cifA_wRi[T2]	pTIGMCS_F	GAGGAAAGGTTGTGTGCGGACGA	592
		RiA2_1101_R	TTGTTGGAGGTGGCGGGCTT
		RiA2_984_F	CGCTACTGCATCACCGGCAAGA	744
		RiA2_1727_R	GCACGCGTCCGTTGGAGAAGAA
		RIA2_1499_F	ATGCAGGCCATCCTGCCGAT	747
		pTIGMCS_R	CGAATTGGTGCTATGTTTATGGCGCT
	cifB_wMel[T1]	pTIGMCS_F	GAGGAAAGGTTGTGTGCGGACGA	843
		cifB_wMel_1,353 R	ACGAAGTTCACCAGGTGTCC
		cifB_wMel_1,141 F	GTTTGAGGTCATCCGCGAGA	703
		cifB_wMel_1,844 R	CCGTATCGATGCTGAAGGGG
		cifB_wMel_1,648 F	CGAGCGCGAGAATATCCCAA	694
		cifB_wMel_2,342 R	CCAGGAAGTTGTTGGCGTTG
		cifB_wMel_2,158 F	TATTCGCGACAACAATGCCG	703
		cifB_wMel_2,861 R	CGTAACTCAGCACCACCTCA
		cifB_wMel_2,642 F	GTGATTCTGACACGCGTGAC	699
		cifB_wMel_3,341 R	TATCGTGTGTCTGCAGCCAG
		cifB_wMel_3,207_F	AGGGCATTCTGCAGCAGATTAA	645
		cifB_wMel_3,852 R	AGGCCGCGAATGTATCCAAT
		cifB_wMel_3,641 F	GATAATAACATCCGCGGCGC	734
		pTIGMCS_R	CGAATTGGTGCTATGTTTATGGCGCT
	cifB_wRec[T1]	pTIGMCS_F	GAGGAAAGGTTGTGTGCGGACGA	678
		cifB_wRec_1,169_R	AATCCTTCTCGCGGATGACC
		cifB_wRec_1,085 F	GGAGGACCTGAACTTCGAGC	711
		cifB_wRec_1,796 R	GGTGTGGATCGAGATGAAGCT
		cifB_wRec_1,577 F	GCTGGCCAATTTCATCCACC	710
		cifB_wRec_2,287 R	TGATTGTTCAGGGTGCACGA
		cifB_wRec_2,095 F	GCAAGTACATCTTCCGCTACG	724
		cifB_wRec_2,819 R	CTCGGTGATCTTGTAGCGGG
		cifB_wRec_2,605 F	TGTACAAAGTGGGCCAGACC	693
		cifB_wRec_3,298 R	TTGTGCACGTCCTCGATCTC
		cifB_wRec_3,075 F	TTCTACATGGAGAAGCGCCC	705
		cifB_wRec_3,780 R	CGTTCTCGTAGGCCCAGATG
		cifB_wRec_3,592 F	TGGTCATCGTGCACCAGAAC	379
		pTIGMCS_R	CGAATTGGTGCTATGTTTATGGCGCT
	cifB_wRi[T1;N]	pTIGMCS_F	GAGGAAAGGTTGTGTGCGGACGA	345
		cifB_wRi5'_855 R	AGGATATTGGCATCGTGGGC
		cifB_wRi5'_657 F	TGACTGTGCGTTAGGTCCTG	668
		cifB_wRi5'_1,325 R	AGATGCTGCCGATCTCCTTC
		cifB_wRi5'_1,169 F	GTCATCCGCGAGAAGGACAG	344
		pTIGMCS_R	CGAATTGGTGCTATGTTTATGGCGCT
	cifB_wRi[T1;C]	pTIGMCS_F	GAGGAAAGGTTGTGTGCGGACGA	403
		cifB_wRi3'_913 R	CAGGTGGATGAAGTTGGCCA
		cifB_wRi3'_755 F	ATCAATATCGAGCGCGGCAT	668
		cifB_wRi3'_1,423 R	GAAGATGTACTTGCGCACGC
		cifB_wRi3'_1,242 F	AGGGCATCCGCGAGAATATC	697
		cifB_wRi3'_1,939 R	GGTCTGGCCCACTTTGTACA
		cifB_wRi3'_1,731 F	ATCAGGTCATGAACGACGGC	716
		cifB_wRi3'_2,447 R	TGTCATCGATGTCCAGCAGG
		cifB_wRi3'_2,225 F	GCCGAGGATTTCATCAGCCT	701
		cifB_wRi3'_2,926 R	GTTCTGGTGCACGATGACCA
		cifB_wRi3'_2,730 F	CCAATGACCGCCACGATTTC	717
		cifB_wRi3'_3,447 R	AAGTCGATGGAGATCACGCG
		cifB_wRi3'_3,226 F	ACAGCGCAATGAGCAGTACT	486
		pTIGMCS_R	CGAATTGGTGCTATGTTTATGGCGCT
	cifB_wRi[T1;T2A]	pTIGMCS_F	GAGGAAAGGTTGTGTGCGGACGA	804
		cifB_wRiT2A_1,314 R	ATCTCCTTCACGGTCAGCAG
		cifB_wRiT2A_1,102 F	GCAGTACAAGGTGTGCATGC	708
		cifB_wRiT2A_1,810 R	GGTGTGGATCGAGATGAAGCT
		cifB_wRiT2A_1,546 F	GAATCGCAGCCAGAAGTTCG	755
		cifB_wRiT2A_2,301 R	TGATTGTTCAGGGTGCACGA
		cifB_wRiT2A_2,125 F	CTACGGCGATGAGAACCACG	714
		cifB_wRiT2A_2,839 R	CATCAGCTCGGTGATCTTGTAG
		cifB_wRiT2A_2,619 F	TGTACAAAGTGGGCCAGACC	692
		cifB_wRiT2A_3,311 R	TGTGCACATCCTCGATCTCG
		cifB_wRiT2A_3,089 F	TTCTACATGGAGAAGCGCCC	698
		cifB_wRiT2A_3,787 R	GTAGGCCCAGATTCCGCAAT
		cifB_wRiT2A_3,606 F	TGGTCATCGTGCACCAGAAC	805
		pTIGMCS_R	CGAATTGGTGCTATGTTTATGGCGCT
	cifB_wRi[T2]	pTIGMCS_F	GAGGAAAGGTTGTGTGCGGACGA	399
		cifB_wRiT2_909 R	GGGCTTCCGGGGTCATTATC
		cifB_wRiT2_728 F	GGCGAGTTCACCGAGAAGTT	709
		cifB_wRiT2_1,437 R	CGGTAGCGGAAGTGCATCAG
		cifB_wRiT2_1,210 F	CTCGTTCCAGGAGATCACCC	692
		cifB_wRiT2_1,902 R	TACAGGAAGATGCGGCGATC
		cifB_wRiT2_1,796_F	GAGAACGTGCGCGATTACCT	636
		cifB_wRiT2_2,432 R	GGCTGTCTGGATCCTCGTTC
		cifB_wRiT2_2,217 F	GCAACCTGACCATCAATCGC	720
		cifB_wRiT2_2,937 R	TCATCCACGGTATCGATGCC
		cifB_wRiT2_2,720 F	GATGTGCAGAATCGCGAGGA	419
		pTIGMCS_R	CGAATTGGTGCTATGTTTATGGCGCT
